# Supplementary material for: Responsive ruthenium complex probe for phosphorescence and time-gated luminescence detection of bisulfite
Source: Royal Society of Chemistry journal article supplement (doi:10.1039/c9dt04614c), 2020-01-01
Supplement: c9dt04614c1.pdf [file c9dt04614c1.pdf]

**Supporting Information for**

**Responsive Ruthenium Complex Probe for Phosphorescence and Time-Gated Luminescence Detection of Bisulfite**

*Wenzhu Zhang,<sup>a\*</sup> Xiuyan Xi,<sup>a</sup> Yong-Lei Wang,<sup>b</sup> Zhongbo Du,<sup>a</sup> Chaolong Liu,<sup>a</sup> Jianping Liu,<sup>b</sup> Bo Song,<sup>a</sup> Jingli Yuan,<sup>a\*</sup> and Run Zhang<sup>c\*</sup>*

<sup>a</sup> State Key Laboratory of Fine Chemicals, School of Chemical Engineering, Dalian University of Technology, Dalian 116024, China

<sup>b</sup> Department of Materials and Environmental Chemistry, Stockholm University, Stockholm, 10691, Sweden

<sup>c</sup> Australian Institute for Bioengineering and Nanotechnology, The University of Queensland, St. Lucia, QLD 4072, Australia

**Table of Contents**

|                                                                  |    |
|------------------------------------------------------------------|----|
| 1. General information .....                                     | 2  |
| 2. Synthesis and characterization of Ru(II) complexes .....      | 3  |
| 3. Theoretical computations .....                                | 8  |
| 4. Supplementary phosphorescence and TGL detection results ..... | 16 |
| 5. Reference .....                                               | 17 |

## 1. General information

### Reagents and instruments

4-Bromo-1,10-phenanthroline<sup>1</sup> and *cis*-Ru(bpy)<sub>2</sub>Cl<sub>2</sub>·2H<sub>2</sub>O<sup>2-3</sup> were synthesized following literature methods. 2,4-Dinitroaniline and phenol were purchased from Aladdin (China). Wine sample was purchased from local supermarket in Dalian, China. Unless otherwise stated, all the reagents used in experiments were obtained from commercial sources. The solvents and reagents are analytical grade from commercial suppliers, and were used directly without further purification. Deionized water was used throughout.

<sup>1</sup>H NMR and <sup>13</sup>C NMR spectra were acquired on a Bruker Avance NMR spectrometer (500 MHz for <sup>1</sup>H and 100 MHz for <sup>13</sup>C). Mass spectra of the compounds were determined on a LTQ Orbitrap XL mass spectrometer and an Agilent 6224 mass spectrometer. Elemental analysis was performed on a Vario-EL analyser. UV-visible absorption spectra were recorded on a Perkin-Elmer Lambda 35 UV-vis spectrometer (1.0 cm quartz cell) at 25 °C. Phosphorescence (0 ns delay time) and time-gated luminescence (TGL, 100 ns delay time) spectra were recorded using an Edinburgh FS5 spectrometer with excitation and emission slits of 3 nm (1.0 cm quartz cell) at 25 °C.

### Theoretical calculation

The theoretical computation was conducted by using the Gaussian 09 package of programs.<sup>4</sup> The molecular structures of **Ru-azo** and **Ru-SO3** at ground-states and excited states were firstly optimized using the density functional theory (DFT).<sup>5</sup> Based on these optimized molecular structures, the related excited-state calculations were then conducted by the time-dependent DFT (TD-DFT) method. The Beck's three-parameter hybrid functional with the Lee-Yang-Parr correlation functional (B3LYP)<sup>6</sup> was used throughout. The LanL2DZ basis set<sup>7</sup> was used for Ru atoms in both complexes, whereas 6-311\*G(d, p) basis set<sup>8</sup> was applied to hydrogen, carbon, nitrogen, sulphur and oxygen atoms. The polarized continuum model (PCM)<sup>9</sup> was employed for the solvent effects (water) in optimization, absorbance and emission calculations.

## 2. Synthesis and characterization of Ru(II) complexes

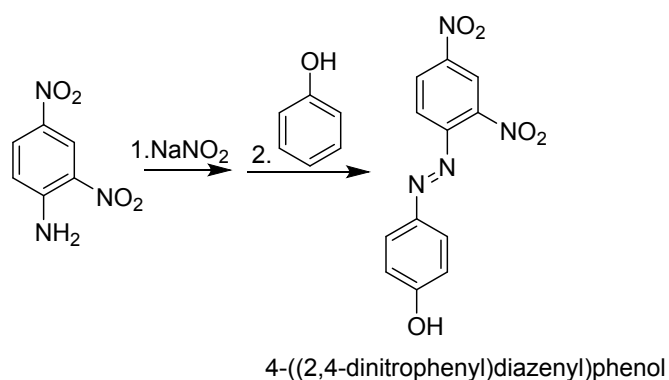

**Scheme S1.** Reaction pathway for the synthesis of 4-((2,4-dinitrophenyl)diazenyl)phenol.

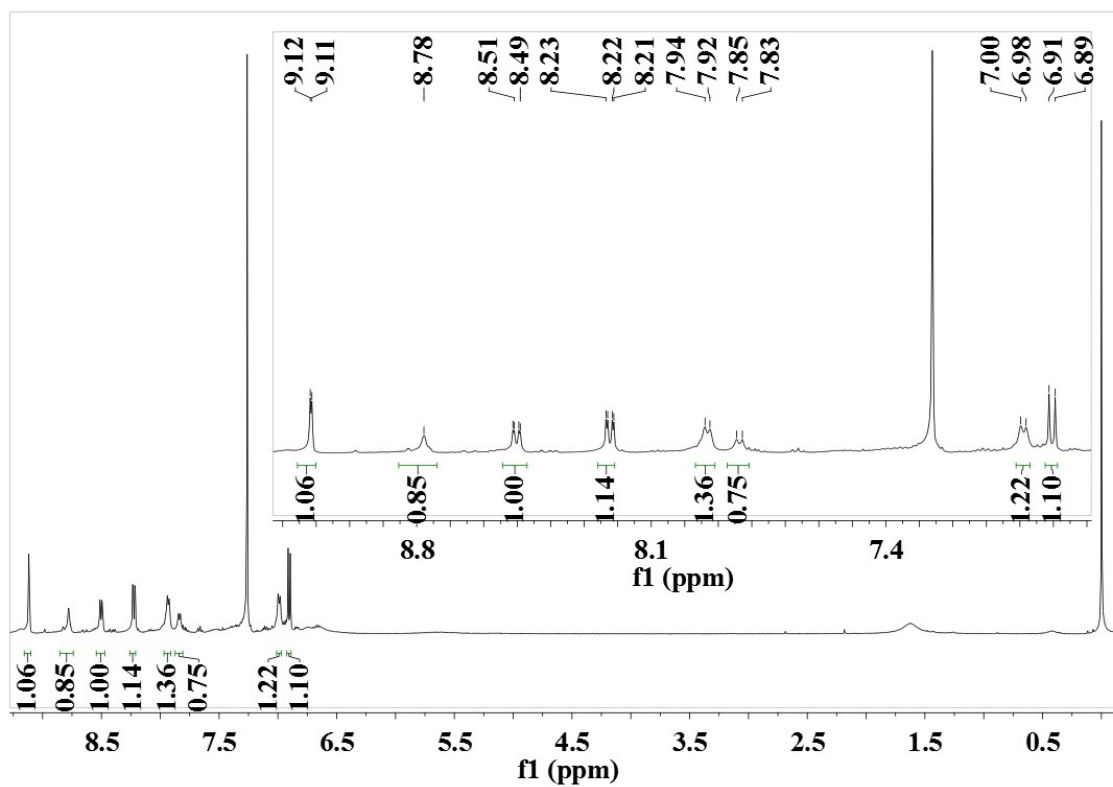

**Fig. S1.**  $^1\text{H}$  NMR spectrum of 4-((2,4-dinitrophenyl)diazenyl)phenol in  $\text{CDCl}_3$ .

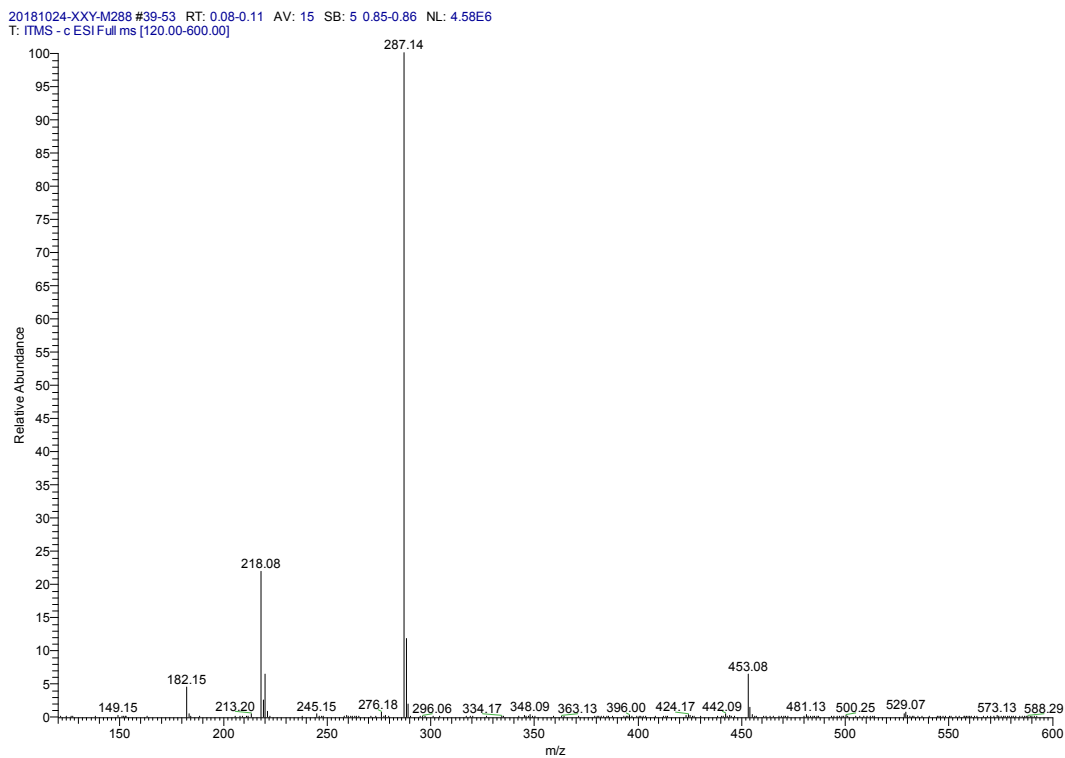

Fig. S2. ESI-MS of 4-((2,4-dinitrophenyl)diazenyl)phenol in  $\text{CHCl}_3$ .

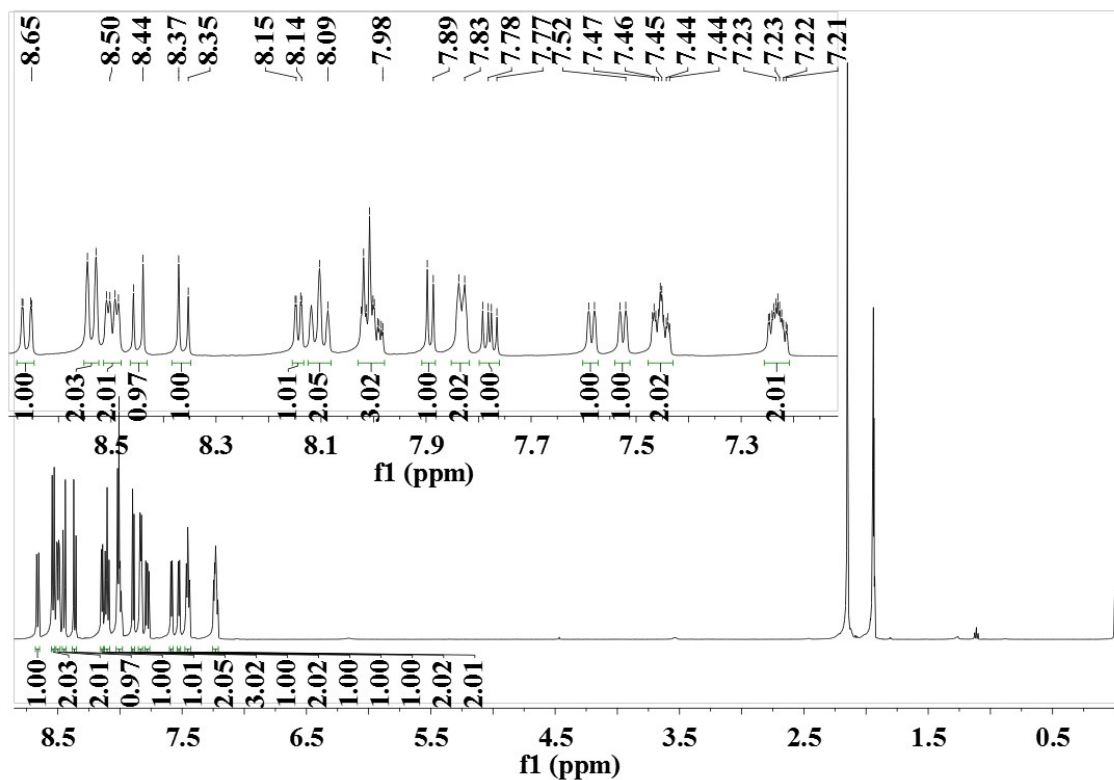

Fig. S3.  $^1\text{H}$  NMR spectrum of  $[\text{Ru}(\text{bpy})_2(\text{Br-phen})](\text{PF}_6)_2$  in  $\text{CD}_3\text{CN}$ .

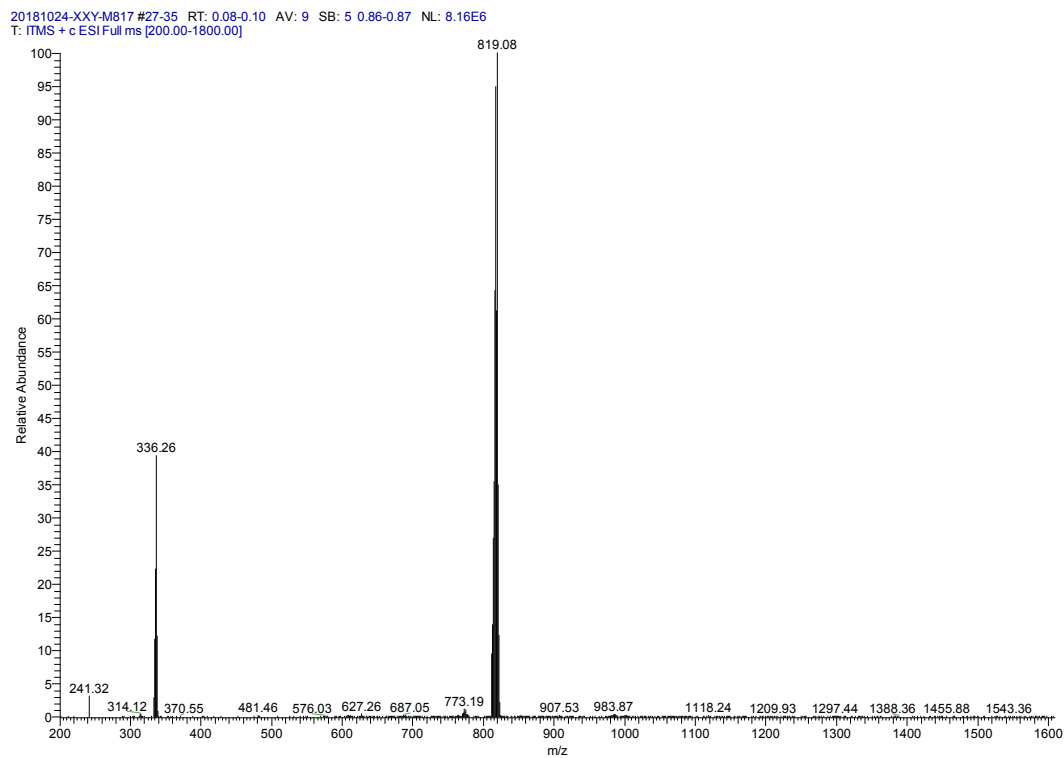

Fig. S4. ESI-MS of  $[\text{Ru}(\text{bpy})_2(\text{Br-phen})](\text{PF}_6)_2$  in  $\text{CH}_3\text{CN}$ .

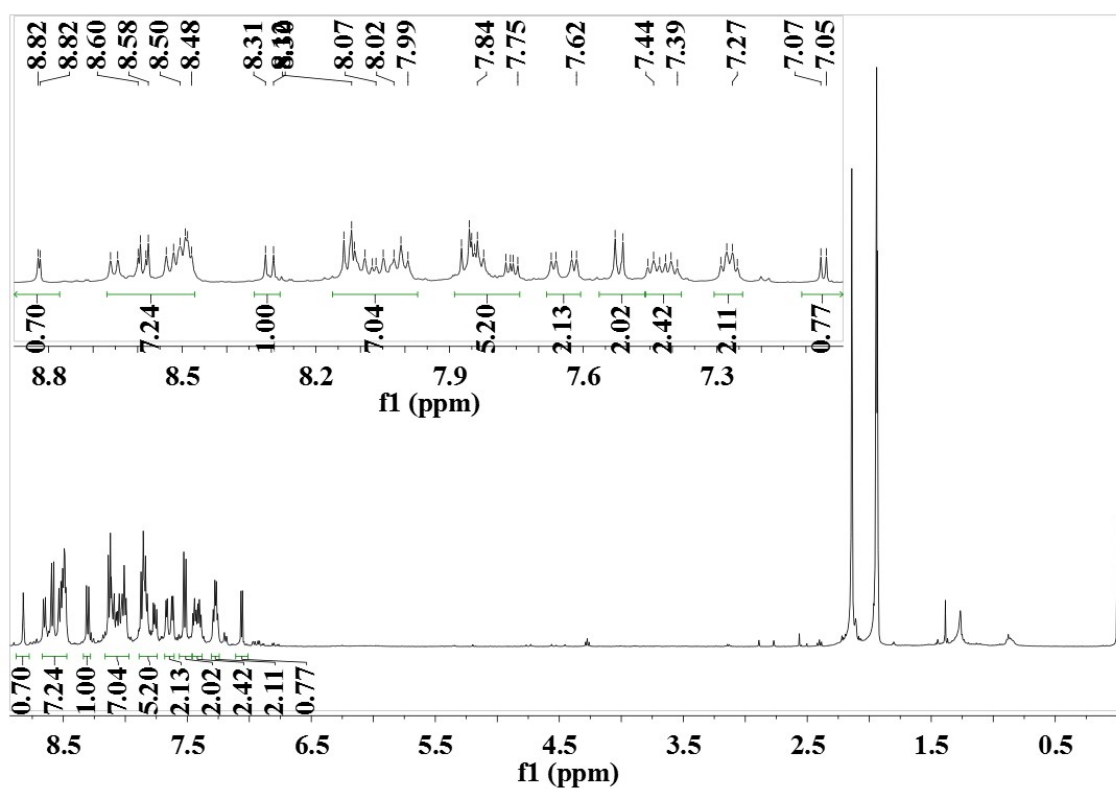

Fig. S5.  $^1\text{H}$  NMR spectrum of **Ru-azo** in  $\text{CD}_3\text{CN}$ .

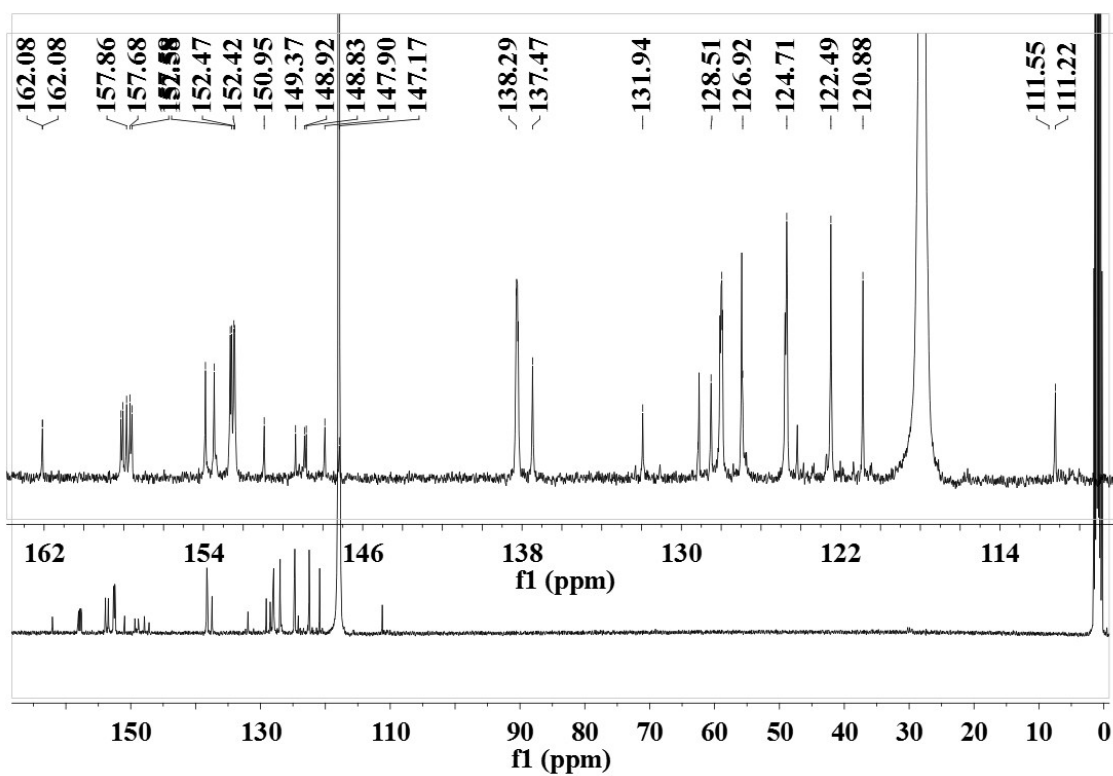

Fig. S6.  $^{13}\text{C}$  NMR spectrum of **Ru-azo** in  $\text{CD}_3\text{CN}$ .

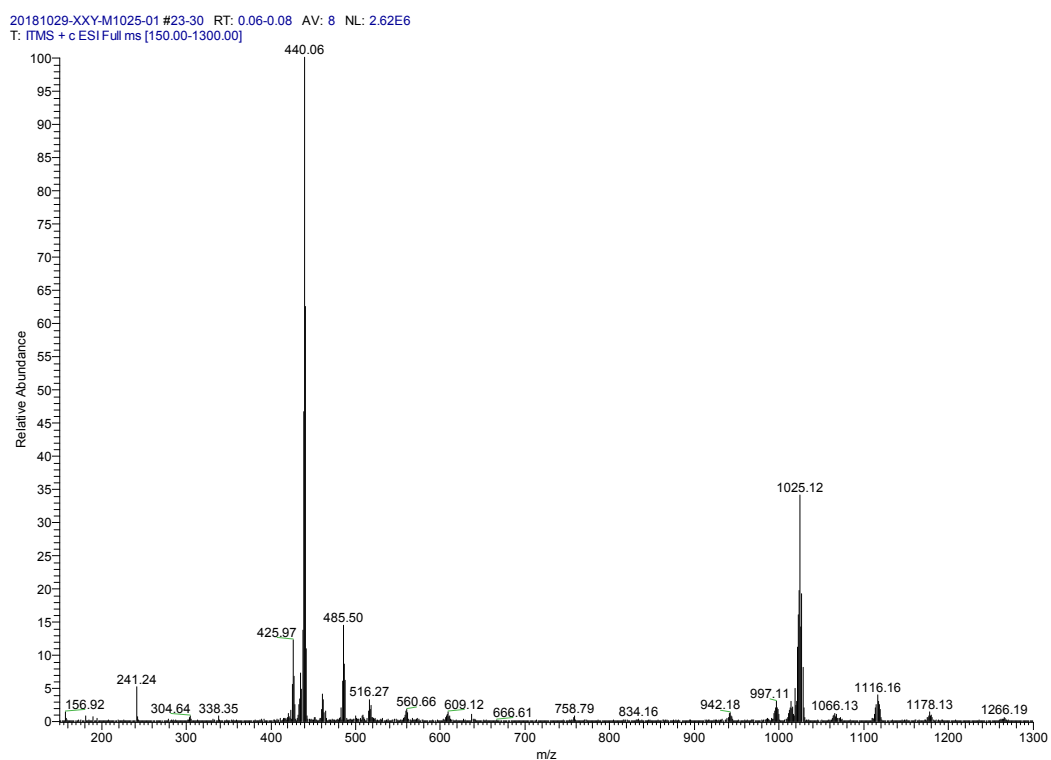

Fig. S7. ESI-MS of **Ru-azo** in  $\text{CH}_3\text{CN}$ .

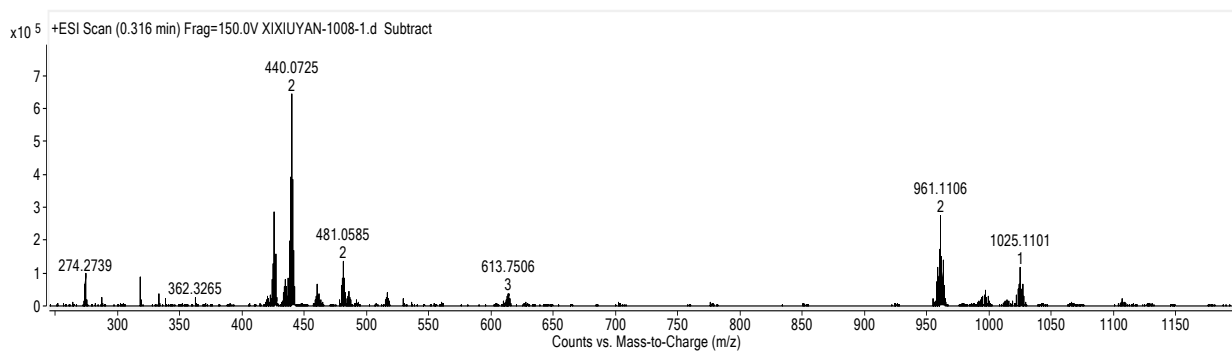

**Fig. S8.** HRMS of **Ru-azo** in the presence of bisulfite.

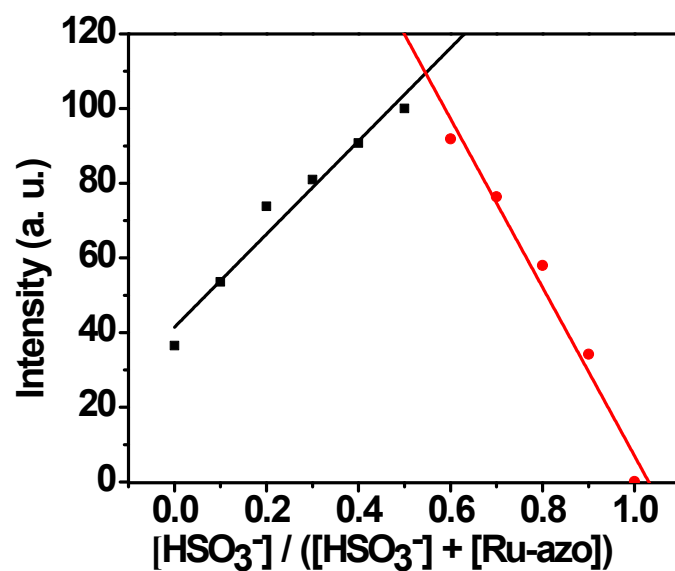

**Fig. S9.** Job plot analysis of the reaction between **Ru-azo** and  $\text{HSO}_3^-$  in PBS (25 mM, pH = 7.4). Total concentration of **Ru-azo** and  $\text{HSO}_3^-$  was at a constant at 10  $\mu\text{M}$ . ( $\lambda_{\text{ex}} = 466 \text{ nm}$ ,  $\lambda_{\text{em}} = 635 \text{ nm}$ ).

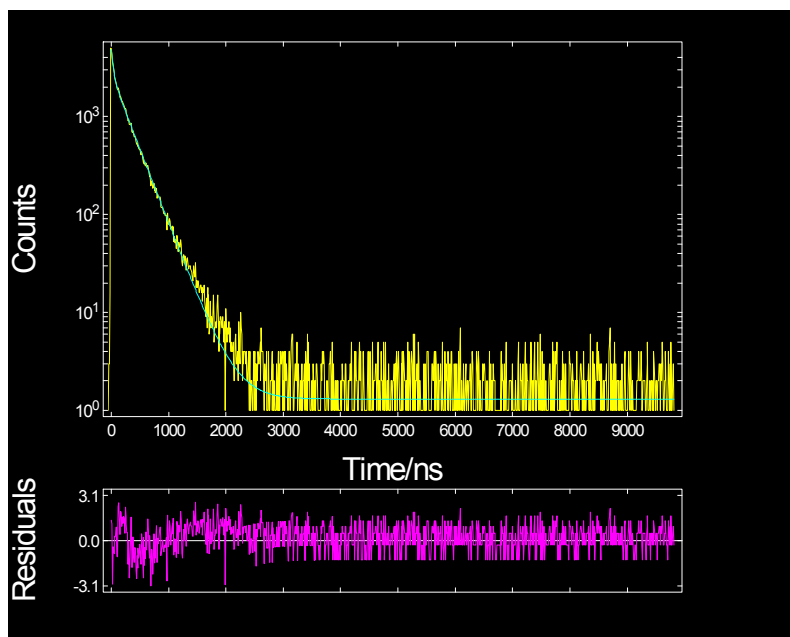

**Fig. S10.** Emission decay trace of **Ru-azo** in 25 mM PBS buffer of pH 7.4.



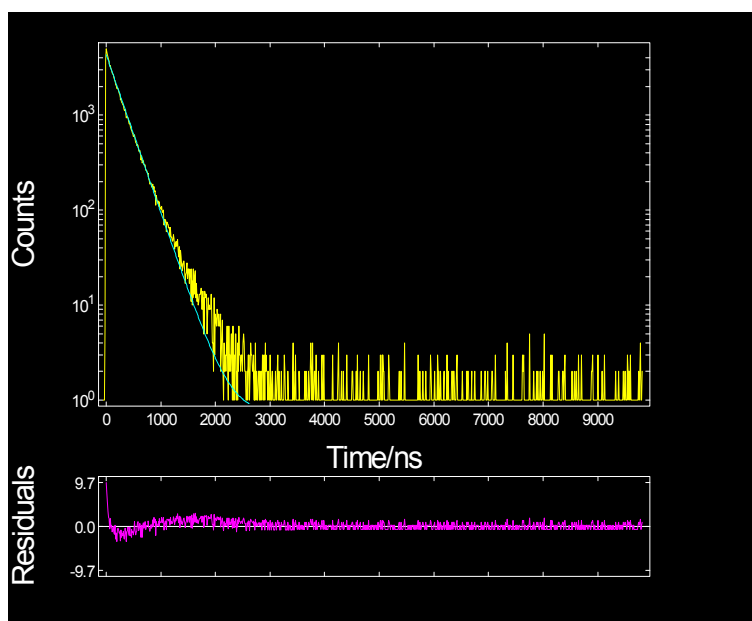

**Fig. S11.** Emission decay trace of **Ru-SO3** in 25 mM PBS buffer of pH 7.4.

### 3. Theoretical computations

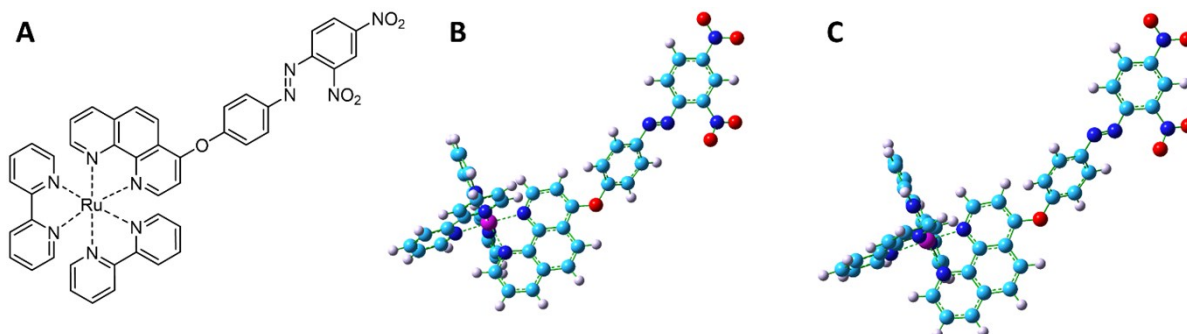

**Fig. S12.** Molecular structure of **Ru-azo** (A) and optimized molecular geometries of **Ru-azo** in the ground state ( $S_0$ ) (B) and first triplet state ( $T_1$ ) (C) obtained from DFT calculations at B3LYP//6-311+G(d, p)//LANL2DZ level of theory.

**Table S1.** Cartesian coordinates of **Ru-azo** in the ground state ( $S_0$ ) and excited state ( $T_1$ ).

| Number | Atom | Coordinates (ground state $S_0$ ) |         |         | Coordinates (excited state $T_1$ ) |         |         |
|--------|------|-----------------------------------|---------|---------|------------------------------------|---------|---------|
|        |      | X                                 | Y       | Z       | X                                  | Y       | Z       |
| 1      | C    | -3.8061                           | -2.5838 | 1.8196  | -3.8061                            | -2.5838 | 1.8196  |
| 2      | C    | -3.6017                           | -3.6017 | -0.4407 | -3.6017                            | -3.2417 | -0.4407 |
| 3      | C    | -3.3923                           | -4.5776 | -0.0756 | -3.3923                            | -4.5776 | -0.0756 |
| 4      | C    | -3.3939                           | -4.9188 | 1.2897  | -3.3939                            | -4.9188 | 1.2897  |
| 5      | C    | -3.6027                           | -3.9100 | 2.2425  | -3.6027                            | -3.9100 | 2.2425  |
| 6      | C    | -4.0334                           | -1.4521 | 2.7398  | -4.0334                            | -1.4521 | 2.7398  |
| 7      | C    | -4.4701                           | 0.8644  | 2.9019  | -4.4701                            | 0.8644  | 2.9019  |
| 8      | C    | -4.4867                           | 0.8053  | 4.3011  | -4.4867                            | 0.8053  | 4.3011  |
| 9      | C    | -4.2645                           | -0.4324 | 4.9330  | -4.2645                            | -0.4324 | 4.9330  |
| 10     | C    | -4.0365                           | -1.5689 | 4.1419  | -4.0365                            | -1.5689 | 4.1419  |
| 11     | H    | -3.6040                           | -2.9407 | -1.4798 | -3.6040                            | -2.9407 | -1.4798 |
| 12     | H    | -3.2342                           | -5.3241 | -0.8458 | -3.2342                            | -5.3241 | -0.8458 |
| 13     | H    | -3.6072                           | -4.1573 | 3.2969  | -3.6072                            | -4.1573 | 3.2969  |
| 14     | H    | -4.6398                           | 1.7967  | 2.3800  | -4.6398                            | 1.7967  | 2.3800  |
| 15     | H    | -4.6681                           | 1.7085  | 4.8728  | -4.6681                            | 1.7085  | 4.8728  |
| 16     | H    | -3.8626                           | -2.5281 | 4.6140  | -3.8626                            | -2.5281 | 4.6140  |
| 17     | C    | -1.9660                           | 1.7176  | 0.0481  | -1.9660                            | 1.7176  | 0.0481  |
| 18     | C    | -0.6967                           | 2.3471  | 0.1183  | -0.6967                            | 2.3471  | 0.1183  |
| 19     | C    | 0.2501                            | 0.1248  | 0.4924  | 0.2501                             | 0.1248  | 0.4924  |
| 20     | C    | -1.0516                           | -0.4103 | 0.4031  | -1.0516                            | -0.4103 | 0.4031  |
| 21     | C    | -3.1420                           | 2.5064  | -0.1780 | -3.1420                            | 2.5064  | -0.1780 |
| 22     | C    | -3.0412                           | 3.9140  | -0.3433 | -3.0412                            | 3.9140  | -0.3433 |
| 23     | C    | -4.2439                           | 4.6406  | -0.5702 | -4.2439                            | 4.6406  | -0.5702 |
| 24     | C    | -5.4546                           | 3.9512  | -0.6197 | -5.4546                            | 3.9512  | -0.6197 |
| 25     | C    | -5.4739                           | 2.5464  | -0.4429 | -5.4739                            | 2.5464  | -0.4429 |
| 26     | H    | 1.0800                            | -0.5438 | 0.6842  | 1.0800                             | -0.5438 | 0.6842  |
| 27     | H    | -1.2073                           | -1.4756 | 0.5123  | -1.2073                            | -1.4756 | 0.5123  |
| 28     | H    | -6.3911                           | 4.4699  | -0.7907 | -6.3911                            | 4.4699  | -0.7907 |
| 29     | H    | -6.4071                           | 1.9988  | -0.4725 | -6.4071                            | 1.9988  | -0.4725 |
| 30     | C    | -5.4301                           | -0.7614 | -2.5844 | -5.4301                            | -0.7614 | -2.5844 |
| 31     | C    | -3.1282                           | -0.3120 | -2.8730 | -3.1282                            | -0.3120 | -2.8730 |
| 32     | C    | -3.2331                           | -0.4508 | -4.2628 | -3.2331                            | -0.4508 | -4.2628 |
| 33     | C    | -4.4876                           | -0.7549 | -4.8239 | -4.4876                            | -0.7549 | -4.8239 |
| 34     | C    | -5.5931                           | -0.9108 | -3.9737 | -5.5931                            | -0.9108 | -3.9737 |
| 35     | C    | -6.5270                           | -0.9047 | -1.6068 | -6.5270                            | -0.9047 | -1.6068 |
| 36     | C    | -7.1216                           | -0.7995 | 0.6778  | -7.1216                            | -0.7995 | 0.6778  |
| 37     | C    | -8.4527                           | -1.1249 | 0.3887  | -8.4527                            | -1.1249 | 0.3887  |
| 38     | C    | -8.8239                           | -1.3484 | -0.9503 | -8.8239                            | -1.3484 | -0.9503 |
| 39     | C    | -7.8496                           | -1.2360 | -1.9540 | -7.8496                            | -1.2360 | -1.9540 |
| 40     | H    | -2.1801                           | -0.0829 | -2.4048 | -2.1801                            | -0.0829 | -2.4048 |
| 41     | H    | -2.3521                           | -0.3223 | -4.8814 | -2.3521                            | -0.3223 | -4.8814 |
| 42     | H    | -6.7987                           | -0.6176 | 1.6943  | -6.7987                            | -0.6176 | 1.6943  |

|    |    |         |         |         |         |         |         |
|----|----|---------|---------|---------|---------|---------|---------|
| 43 | H  | -9.1726 | -1.2001 | 1.1959  | -9.1726 | -1.2001 | 1.1959  |
| 44 | N  | -3.8043 | -2.2602 | 0.4802  | -3.8043 | -2.2602 | 0.4802  |
| 45 | N  | -2.1424 | 0.3529  | 0.1819  | -2.1424 | 0.3529  | 0.1819  |
| 46 | N  | -6.1737 | -0.6896 | -0.2927 | -6.1737 | -0.6896 | -0.2927 |
| 47 | N  | -4.1977 | -0.4635 | -2.0447 | -4.1977 | -0.4635 | -2.0447 |
| 48 | N  | -4.2491 | -0.2352 | 2.1310  | -4.2491 | -0.2352 | 2.1310  |
| 49 | N  | -4.3494 | 1.8333  | -0.2238 | -4.3494 | 1.8333  | -0.2238 |
| 50 | Ru | -4.1566 | -0.2467 | 0.0381  | -4.1566 | -0.2467 | 0.0381  |
| 51 | H  | -8.1202 | -1.4055 | -2.9890 | -8.1202 | -1.4055 | -2.9890 |
| 52 | H  | -6.5647 | -1.1446 | -4.3911 | -6.5647 | -1.1446 | -4.3911 |
| 53 | H  | -4.6025 | -0.8681 | -5.8967 | -4.6025 | -0.8681 | -5.8967 |
| 54 | H  | -9.8466 | -1.6036 | -1.2074 | -9.8466 | -1.6036 | -1.2074 |
| 55 | H  | -3.2364 | -5.9448 | 1.6054  | -3.2364 | -5.9448 | 1.6054  |
| 56 | H  | -4.2686 | -0.5114 | 6.0151  | -4.2686 | -0.5114 | 6.0151  |
| 57 | C  | 2.8974  | 1.5355  | 0.2263  | 2.8974  | 1.5355  | 0.2263  |
| 58 | C  | 3.9511  | 1.9170  | 1.0821  | 3.9511  | 1.9170  | 1.0821  |
| 59 | C  | 3.1043  | 0.6854  | -0.8761 | 3.1043  | 0.6854  | -0.8761 |
| 60 | C  | 5.2379  | 1.4317  | 0.8410  | 5.2379  | 1.4317  | 0.8410  |
| 61 | H  | 3.7444  | 2.5837  | 1.9125  | 3.7444  | 2.5837  | 1.9125  |
| 62 | C  | 4.3972  | 0.1999  | -1.1119 | 4.3972  | 0.1999  | -1.1119 |
| 63 | H  | 2.2904  | 0.4225  | -1.5429 | 2.2904  | 0.4225  | -1.5429 |
| 64 | C  | 5.4658  | 0.5646  | -0.2600 | 5.4658  | 0.5646  | -0.2600 |
| 65 | H  | 6.0645  | 1.7110  | 1.4850  | 6.0645  | 1.7110  | 1.4850  |
| 66 | H  | 4.5970  | -0.4525 | -1.9562 | 4.5970  | -0.4525 | -1.9562 |
| 67 | H  | -4.2102 | 5.7179  | -0.7011 | -4.2102 | 5.7179  | -0.7011 |
| 68 | C  | -1.7376 | 4.5295  | -0.2728 | -1.7376 | 4.5295  | -0.2728 |
| 69 | C  | -0.6067 | 3.7764  | -0.0477 | -0.6067 | 3.7764  | -0.0477 |
| 70 | H  | -1.6644 | 5.6055  | -0.4014 | -1.6644 | 5.6055  | -0.4014 |
| 71 | H  | 0.3707  | 4.2421  | 0.0051  | 0.3707  | 4.2421  | 0.0051  |
| 72 | C  | 0.4303  | 1.5017  | 0.3460  | 0.4303  | 1.5017  | 0.3460  |
| 73 | O  | 1.6526  | 2.1488  | 0.4809  | 1.6526  | 2.1488  | 0.4809  |
| 74 | N  | 6.7291  | 0.0140  | -0.6066 | 6.7291  | 0.0140  | -0.6066 |
| 75 | N  | 7.7233  | 0.3674  | 0.1347  | 7.7233  | 0.3674  | 0.1347  |
| 76 | C  | 8.9551  | -0.2759 | -0.1467 | 8.9551  | -0.2759 | -0.1467 |
| 77 | C  | 10.1774 | 0.3913  | 0.1393  | 10.1774 | 0.3913  | 0.1393  |
| 78 | C  | 9.0179  | -1.6290 | -0.5585 | 9.0179  | -1.6290 | -0.5585 |
| 79 | C  | 11.4140 | -0.2542 | 0.0468  | 11.4140 | -0.2542 | 0.0468  |
| 80 | C  | 10.2423 | -2.2881 | -0.6827 | 10.2423 | -2.2881 | -0.6827 |
| 81 | H  | 8.0887  | -2.1512 | -0.7577 | 8.0887  | -2.1512 | -0.7577 |
| 82 | C  | 11.4266 | -1.5911 | -0.3707 | 11.4266 | -1.5911 | -0.3707 |
| 83 | H  | 12.3340 | 0.2700  | 0.2736  | 12.3340 | 0.2700  | 0.2736  |
| 84 | H  | 10.2906 | -3.3210 | -1.0067 | 10.2906 | -3.3210 | -1.0067 |
| 85 | N  | 10.1923 | 1.8093  | 0.5186  | 10.1923 | 1.8093  | 0.5186  |
| 86 | N  | 12.7175 | -2.2793 | -0.4865 | 12.7175 | -2.2793 | -0.4865 |
| 87 | O  | 9.2747  | 2.5777  | 0.0704  | 9.2747  | 2.5777  | 0.0704  |

|           |   |         |         |         |         |         |         |
|-----------|---|---------|---------|---------|---------|---------|---------|
| <b>88</b> | O | 11.1454 | 2.2190  | 1.2732  | 11.1454 | 2.2190  | 1.2732  |
| <b>89</b> | O | 12.7228 | -3.5036 | -0.8614 | 12.7228 | -3.5036 | -0.8614 |
| <b>90</b> | O | 13.7854 | -1.6289 | -0.2080 | 13.7854 | -1.6289 | -0.2080 |

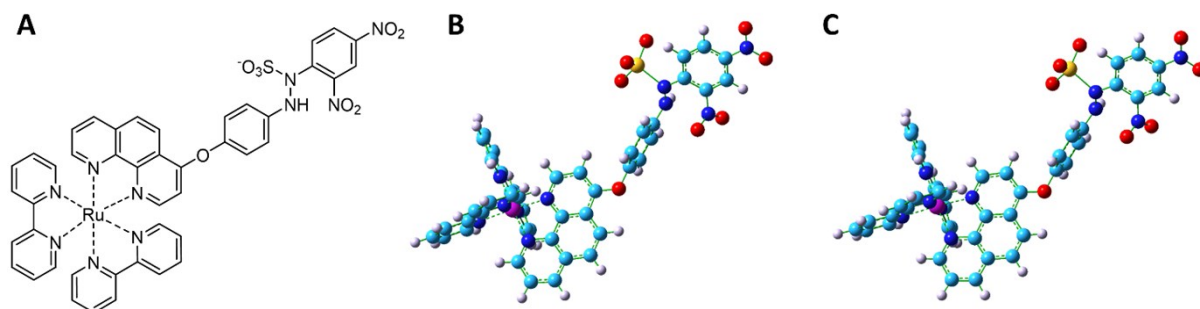

**Fig. S13.** Molecular structure of **Ru-SO3** (A) and optimized molecular geometries of **Ru-SO3** in the ground state ( $S_0$ ) (B) and first triplet state ( $T_1$ ) (C) obtained from DFT calculations at B3LYP//6-311+G(d, p)//LANL2DZ level of theory.

**Table S2.** Cartesian coordinates of **Ru-SO3** in the ground state ( $S_0$ ) and excited state ( $T_1$ ).

| Number    | Atom | Coordinates (ground state $S_0$ ) |         |         | Coordinates (excited state $T_1$ ) |         |         |
|-----------|------|-----------------------------------|---------|---------|------------------------------------|---------|---------|
|           |      | X                                 | Y       | Z       | X                                  | Y       | Z       |
| <b>1</b>  | C    | 4.1580                            | -2.4903 | -1.7055 | 4.1580                             | -2.4903 | -1.7055 |
| <b>2</b>  | C    | 3.8948                            | -3.1080 | 0.5601  | 3.8948                             | -3.1080 | 0.5601  |
| <b>3</b>  | C    | 3.6468                            | -4.4413 | 0.2105  | 3.6468                             | -4.4413 | 0.2105  |
| <b>4</b>  | C    | 3.6576                            | -4.8021 | -1.1498 | 3.6576                             | -4.8021 | -1.1498 |
| <b>5</b>  | C    | 3.9157                            | -3.8148 | -2.1130 | 3.9157                             | -3.8148 | -2.1130 |
| <b>6</b>  | C    | 4.4396                            | -1.3807 | -2.6374 | 4.4396                             | -1.3807 | -2.6374 |
| <b>7</b>  | C    | 4.9474                            | 0.9193  | -2.8245 | 4.9474                             | 0.9193  | -2.8245 |
| <b>8</b>  | C    | 4.9890                            | 0.8386  | -4.2221 | 4.9890                             | 0.8386  | -4.2221 |
| <b>9</b>  | C    | 4.7440                            | -0.4019 | -4.8402 | 4.7440                             | -0.4019 | -4.8402 |
| <b>10</b> | C    | 4.4674                            | -1.5190 | -4.0373 | 4.4674                             | -1.5190 | -4.0373 |
| <b>11</b> | H    | 3.8901                            | -2.7918 | 1.5948  | 3.8901                             | -2.7918 | 1.5948  |
| <b>12</b> | H    | 3.4514                            | -5.1709 | 0.9883  | 3.4514                             | -5.1709 | 0.9883  |
| <b>13</b> | H    | 3.9276                            | -4.0772 | -3.1637 | 3.9276                             | -4.0772 | -3.1637 |
| <b>14</b> | H    | 5.1335                            | 1.8546  | -2.3134 | 5.1335                             | 1.8546  | -2.3134 |
| <b>15</b> | H    | 5.2066                            | 1.7276  | -4.8032 | 5.2066                             | 1.7276  | -4.8032 |
| <b>16</b> | H    | 4.2754                            | -2.4799 | -4.4988 | 4.2754                             | -2.4799 | -4.4988 |
| <b>17</b> | C    | 2.4170                            | 1.8906  | -0.0375 | 2.4170                             | 1.8906  | -0.0375 |
| <b>18</b> | C    | 1.1711                            | 2.5579  | -0.1455 | 1.1711                             | 2.5579  | -0.1455 |
| <b>19</b> | C    | 0.1603                            | 0.3598  | -0.4942 | 0.1603                             | 0.3598  | -0.4942 |
| <b>20</b> | C    | 1.4426                            | -0.2128 | -0.3715 | 1.4426                             | -0.2128 | -0.3715 |
| <b>21</b> | C    | 3.6125                            | 2.6471  | 0.1986  | 3.6125                             | 2.6471  | 0.1986  |
| <b>22</b> | C    | 3.5529                            | 4.0605  | 0.3367  | 3.5529                             | 4.0605  | 0.3367  |
| <b>23</b> | C    | 4.7734                            | 4.7530  | 0.5766  | 4.7734                             | 4.7530  | 0.5766  |

|    |    |         |         |         |         |         |         |
|----|----|---------|---------|---------|---------|---------|---------|
| 24 | C  | 5.9608  | 4.0277  | 0.6630  | 5.9608  | 4.0277  | 0.6630  |
| 25 | C  | 5.9395  | 2.6202  | 0.5099  | 5.9395  | 2.6202  | 0.5099  |
| 26 | H  | -0.6904 | -0.2853 | -0.6734 | -0.6904 | -0.2853 | -0.6734 |
| 27 | H  | 1.5659  | -1.2852 | -0.4524 | 1.5659  | -1.2852 | -0.4524 |
| 28 | H  | 6.9094  | 4.5202  | 0.8445  | 6.9094  | 4.5202  | 0.8445  |
| 29 | H  | 6.8541  | 2.0439  | 0.5670  | 6.8541  | 2.0439  | 0.5670  |
| 30 | C  | 5.7517  | -0.6384 | 2.7062  | 5.7517  | -0.6384 | 2.7062  |
| 31 | C  | 3.4573  | -0.1210 | 2.9349  | 3.4573  | -0.1210 | 2.9349  |
| 32 | C  | 3.5292  | -0.2308 | 4.3293  | 3.5292  | -0.2308 | 4.3293  |
| 33 | C  | 4.7633  | -0.5541 | 4.9241  | 4.7633  | -0.5541 | 4.9241  |
| 34 | C  | 5.8819  | -0.7593 | 4.1018  | 5.8819  | -0.7593 | 4.1018  |
| 35 | C  | 6.8634  | -0.8352 | 1.7550  | 6.8634  | -0.8352 | 1.7550  |
| 36 | C  | 7.5080  | -0.7956 | -0.5182 | 7.5080  | -0.7956 | -0.5182 |
| 37 | C  | 8.8215  | -1.1580 | -0.1946 | 8.8215  | -1.1580 | -0.1946 |
| 38 | C  | 9.1575  | -1.3668 | 1.1562  | 9.1575  | -1.3668 | 1.1562  |
| 39 | C  | 8.1669  | -1.2027 | 2.1365  | 8.1669  | -1.2027 | 2.1365  |
| 40 | H  | 2.5266  | 0.1220  | 2.4398  | 2.5266  | 0.1220  | 2.4398  |
| 41 | H  | 2.6391  | -0.0654 | 4.9258  | 2.6391  | -0.0654 | 4.9258  |
| 42 | H  | 7.2123  | -0.6242 | -1.5449 | 7.2123  | -0.6242 | -1.5449 |
| 43 | H  | 9.5551  | -1.2728 | -0.9847 | 9.5551  | -1.2728 | -0.9847 |
| 44 | N  | 4.1446  | -2.1471 | -0.3710 | 4.1446  | -2.1471 | -0.3710 |
| 45 | N  | 2.5540  | 0.5186  | -0.1448 | 2.5540  | 0.5186  | -0.1448 |
| 46 | N  | 6.5440  | -0.6358 | 0.4295  | 6.5440  | -0.6358 | 0.4295  |
| 47 | N  | 4.5398  | -0.3190 | 2.1339  | 4.5398  | -0.3190 | 2.1339  |
| 48 | N  | 4.6806  | -0.1619 | -2.0419 | 4.6806  | -0.1619 | -2.0419 |
| 49 | N  | 4.7978  | 1.9386  | 0.2801  | 4.7978  | 1.9386  | 0.2801  |
| 50 | Ru | 4.5491  | -0.1390 | 0.0480  | 4.5491  | -0.1390 | 0.0480  |
| 51 | H  | 8.4099  | -1.3613 | 3.1800  | 8.4099  | -1.3613 | 3.1800  |
| 52 | H  | 6.8382  | -1.0080 | 4.5452  | 6.8382  | -1.0080 | 4.5452  |
| 53 | H  | 4.8527  | -0.6446 | 6.0016  | 4.8527  | -0.6446 | 6.0016  |
| 54 | H  | 10.1656 | -1.6504 | 1.4397  | 10.1656 | -1.6504 | 1.4397  |
| 55 | H  | 3.4696  | -5.8265 | -1.4537 | 3.4696  | -5.8265 | -1.4537 |
| 56 | H  | 4.7672  | -0.4973 | -5.9207 | 4.7672  | -0.4973 | -5.9207 |
| 57 | C  | -2.4125 | 1.7039  | -0.6510 | -2.4125 | 1.7039  | -0.6510 |
| 58 | C  | -2.9314 | 1.5314  | -1.9421 | -2.9314 | 1.5314  | -1.9421 |
| 59 | C  | -3.1088 | 1.2692  | 0.4867  | -3.1088 | 1.2692  | 0.4867  |
| 60 | C  | -4.1736 | 0.8961  | -2.0981 | -4.1736 | 0.8961  | -2.0981 |
| 61 | H  | -2.3766 | 1.8846  | -2.8058 | -2.3766 | 1.8846  | -2.8058 |
| 62 | C  | -4.3532 | 0.6408  | 0.3321  | -4.3532 | 0.6408  | 0.3321  |
| 63 | H  | -2.6879 | 1.4264  | 1.4752  | -2.6879 | 1.4264  | 1.4752  |
| 64 | C  | -4.8860 | 0.4495  | -0.9620 | -4.8860 | 0.4495  | -0.9620 |
| 65 | H  | -4.5835 | 0.7512  | -3.0943 | -4.5835 | 0.7512  | -3.0943 |
| 66 | H  | -4.9062 | 0.3010  | 1.2001  | -4.9062 | 0.3010  | 1.2001  |
| 67 | H  | 4.7707  | 5.8330  | 0.6884  | 4.7707  | 5.8330  | 0.6884  |
| 68 | C  | 2.2718  | 4.7151  | 0.2256  | 2.2718  | 4.7151  | 0.2256  |

|    |   |          |         |         |          |         |         |
|----|---|----------|---------|---------|----------|---------|---------|
| 69 | C | 1.1230   | 3.9919  | -0.0093 | 1.1230   | 3.9919  | -0.0093 |
| 70 | H | 2.2300   | 5.7955  | 0.3301  | 2.2300   | 5.7955  | 0.3301  |
| 71 | H | 0.1619   | 4.4863  | -0.0936 | 0.1619   | 4.4863  | -0.0936 |
| 72 | C | 0.0176   | 1.7462  | -0.3817 | 0.0176   | 1.7462  | -0.3817 |
| 73 | O | -1.1841  | 2.4209  | -0.4861 | -1.1841  | 2.4209  | -0.4861 |
| 74 | C | -8.0791  | -0.5298 | 0.2142  | -8.0791  | -0.5298 | 0.2142  |
| 75 | C | -8.7038  | 0.7162  | -0.1079 | -8.7038  | 0.7162  | -0.1079 |
| 76 | C | -8.8748  | -1.4682 | 0.9384  | -8.8748  | -1.4682 | 0.9384  |
| 77 | C | -10.0488 | 0.9734  | 0.1539  | -10.0488 | 0.9734  | 0.1539  |
| 78 | C | -10.2058 | -1.2110 | 1.2428  | -10.2058 | -1.2110 | 1.2428  |
| 79 | H | -8.4422  | -2.4080 | 1.2530  | -8.4422  | -2.4080 | 1.2530  |
| 80 | C | -10.8010 | -0.0004 | 0.8250  | -10.8010 | -0.0004 | 0.8250  |
| 81 | H | -10.4977 | 1.9198  | -0.1255 | -10.4977 | 1.9198  | -0.1255 |
| 82 | H | -10.7945 | -1.9416 | 1.7851  | -10.7945 | -1.9416 | 1.7851  |
| 83 | N | -7.9440  | 1.8592  | -0.6541 | -7.9440  | 1.8592  | -0.6541 |
| 84 | N | -12.1995 | 0.2576  | 1.1112  | -12.1995 | 0.2576  | 1.1112  |
| 85 | O | -7.0010  | 2.3461  | 0.0577  | -7.0010  | 2.3461  | 0.0577  |
| 86 | O | -8.3341  | 2.3746  | -1.7590 | -8.3341  | 2.3746  | -1.7590 |
| 87 | O | -12.8745 | -0.6335 | 1.7463  | -12.8745 | -0.6335 | 1.7463  |
| 88 | O | -12.7193 | 1.3677  | 0.7201  | -12.7193 | 1.3677  | 0.7201  |
| 89 | N | -6.1567  | -0.1417 | -1.1528 | -6.1567  | -0.1417 | -1.1528 |
| 90 | H | -6.4346  | -0.3685 | -2.1076 | -6.4346  | -0.3685 | -2.1076 |
| 91 | N | -6.7705  | -0.8406 | -0.1442 | -6.7705  | -0.8406 | -0.1442 |
| 92 | S | -6.1741  | -2.7740 | -0.0140 | -6.1741  | -2.7740 | -0.0140 |
| 93 | O | -7.3313  | -3.7076 | -0.7054 | -7.3313  | -3.7076 | -0.7054 |
| 94 | O | -5.9929  | -3.0294 | 1.5921  | -5.9929  | -3.0294 | 1.5921  |
| 95 | O | -4.7953  | -2.6758 | -0.8761 | -4.7953  | -2.6758 | -0.8761 |

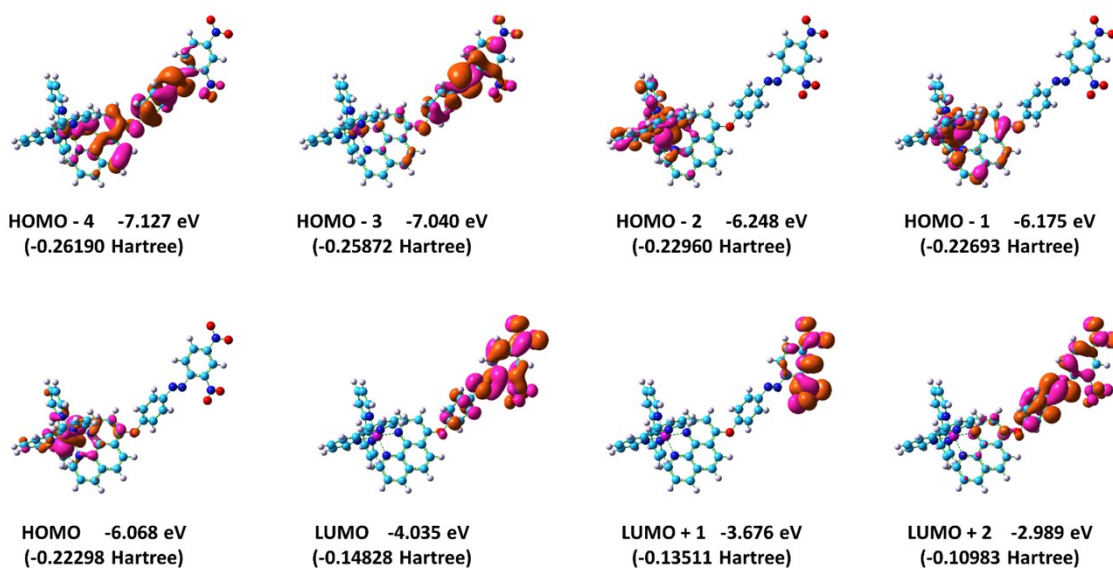

**Fig. S14.** Representative frontier molecular orbital distributions of **Ru-azo** and their corresponding energies at ground state ( $S_0$ ) optimized geometries (isodensity contour = 0.02 a.u.).

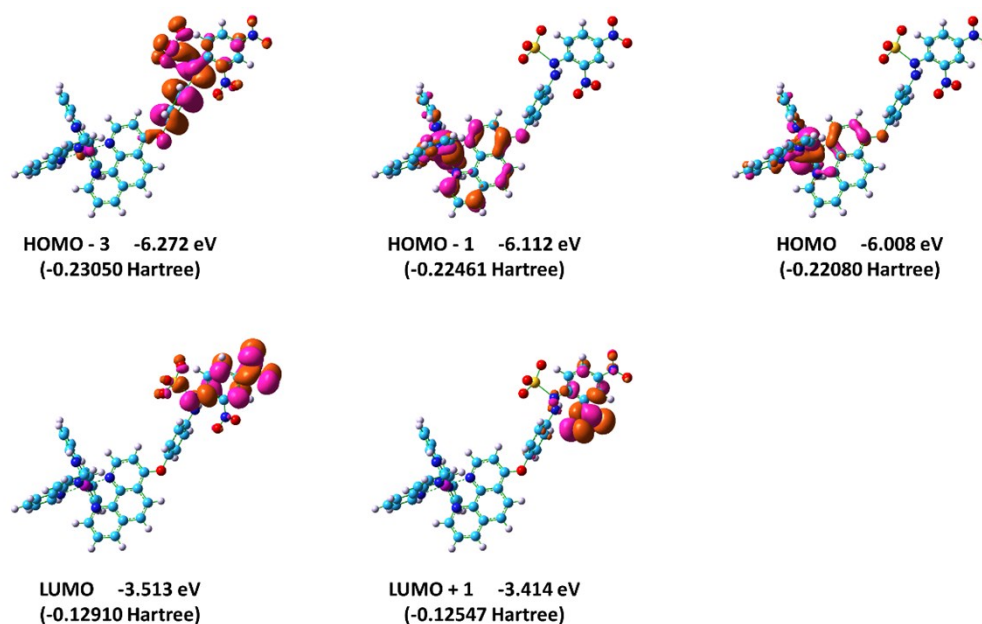

**Fig. S15.** Representative frontier molecular orbital distributions of **Ru-SO3** and their corresponding energies at ground state ( $S_0$ ) optimized geometries (isodensity contour = 0.02 a.u.).

**Table S3.** Absorptions of **Ru-azo** and **Ru-SO3** in aqueous solution from the calculation conducted by TDDFT//B3LYP//6-311+G(d, p), based on the optimized molecular geometries in the ground state.

| Complexes      | State          | Energy<br>(eV) <sup>a</sup> | Wavelength<br>(nm) | $f^b$       | Composition <sup>c</sup> | Contributi<br>on <sup>d</sup> (%) | Assignment <sup>e</sup> |
|----------------|----------------|-----------------------------|--------------------|-------------|--------------------------|-----------------------------------|-------------------------|
| <b>Ru-azo</b>  | S <sub>1</sub> | 1.8115                      | 684.42             | 0.0209      | HOMO→LUMO                | 99.07                             | ET                      |
|                | S <sub>2</sub> | 1.9156                      | 647.24             | 0.0485      | HOMO-1→LUMO              | 98.92                             | ET                      |
|                | S <sub>3</sub> | 1.9979                      | 620.56             | 0.0010      | HOMO-2→LUMO              | 99.41                             | ET                      |
|                | S <sub>4</sub> | 2.0939                      | 592.13             | 0.0504      | HOMO-4→LUMO              | 20.12                             | ET, IL'CT               |
|                |                |                             |                    |             | HOMO-3→LUMO              | 63.04                             | ET, IL'CT               |
| S <sub>5</sub> | 2.1964         | 564.50                      | 0.0001             | HOMO→LUMO+1 | 99.23                    | ET                                |                         |
| <b>Ru-SO3</b>  | S <sub>1</sub> | 2.1352                      | 580.67             | 0.0229      | HOMO-3→LUMO+1            | 87.07                             | IL'CT                   |
|                | S <sub>2</sub> | 2.3061                      | 537.64             | 0.0015      | HOMO→LUMO                | 97.29                             | ET                      |
|                | S <sub>3</sub> | 2.3514                      | 527.28             | 0.0637      | HOMO-3→LUMO              | 88.42                             | IL'CT                   |
|                |                |                             |                    |             | HOMO→LUMO+1              | 10.26                             | ET                      |
|                | S <sub>4</sub> | 2.3067                      | 525.20             | 0.0078      | HOMO→LUMO+1              | 87.41                             | ET                      |
| S <sub>5</sub> | 2.4122         | 513.99                      | 0.0024             | HOMO-1→LUMO | 90.90                    | ET, IL'CT                         |                         |

<sup>a</sup>Only the selected low-lying excited states are presented. <sup>b</sup>Oscillator strength. <sup>c</sup>Only the main configurations are presented. <sup>d</sup>Contributions over 10% are presented. IL'CT: intraligand charge transfer; ET: electron transfer (L: bpy; L': azo-phen or SO3-phen).

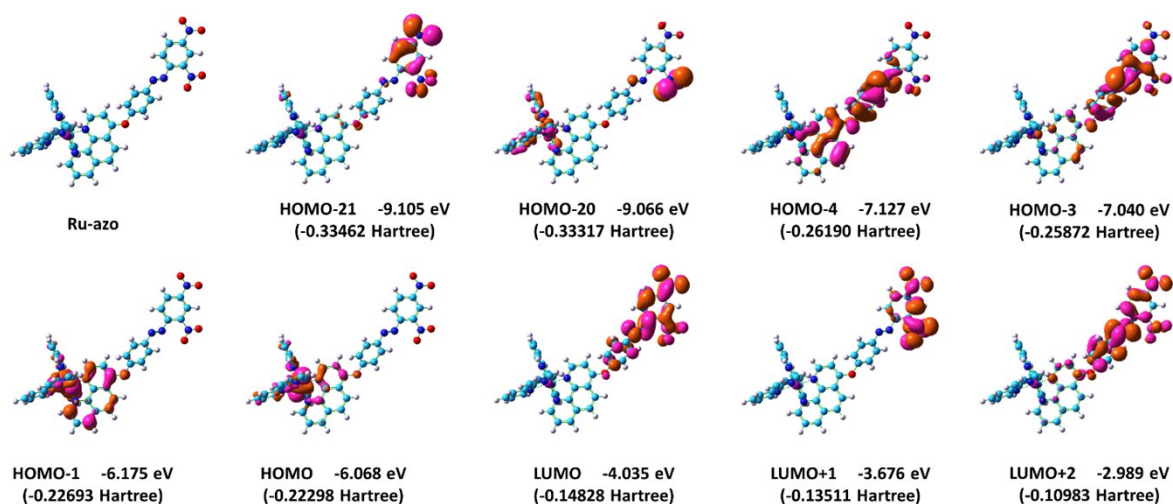

**Fig. S16.** Representative frontier molecular orbital distributions of **Ru-azo** and their corresponding energies at excited state ( $T_1$ ) optimized geometries (isodensity contour = 0.02 a.u.).

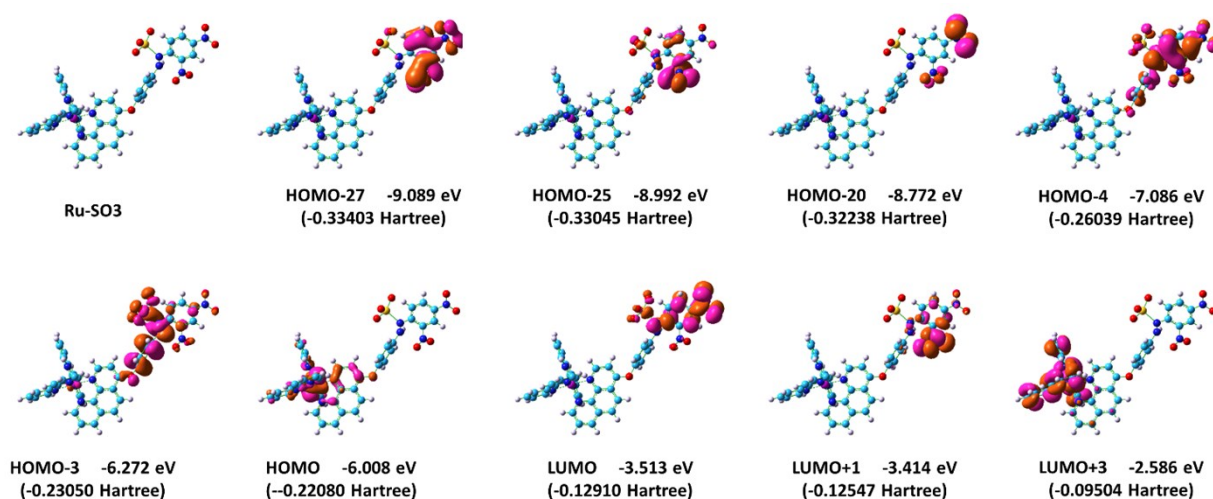

**Fig. S17.** Representative frontier molecular orbital distributions of **Ru-SO3** and their corresponding energies at excited state ( $T_1$ ) optimized geometries (isodensity contour = 0.02 a.u.).



#### 4. Supplementary phosphorescence and TGL detection results

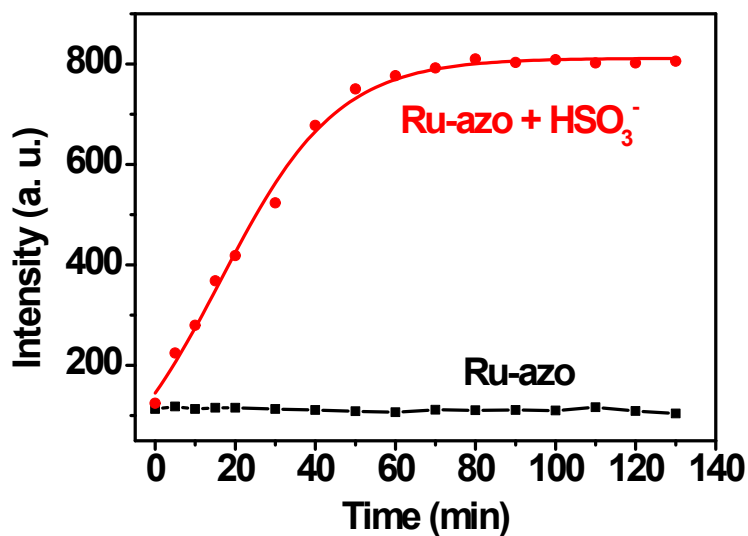

**Fig. S18.** Time-dependent phosphorescence response ( $\lambda_{\text{ex}} = 466 \text{ nm}$ ,  $\lambda_{\text{em}} = 635 \text{ nm}$ ) of **Ru-azo** ( $10 \mu\text{M}$ ) to the addition of bisulfite ( $500 \mu\text{M}$ ).

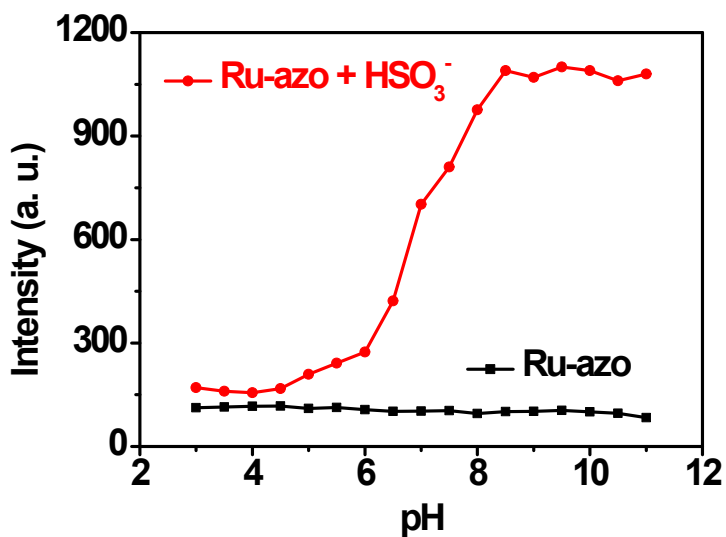

**Fig. S19.** Effects of pH on the phosphorescence intensity ( $\lambda_{\text{ex}} = 466 \text{ nm}$ ,  $\lambda_{\text{em}} = 635 \text{ nm}$ ) of **Ru-azo** ( $10 \mu\text{M}$ ) in the absence and presence of bisulfite ( $500 \mu\text{M}$ ).

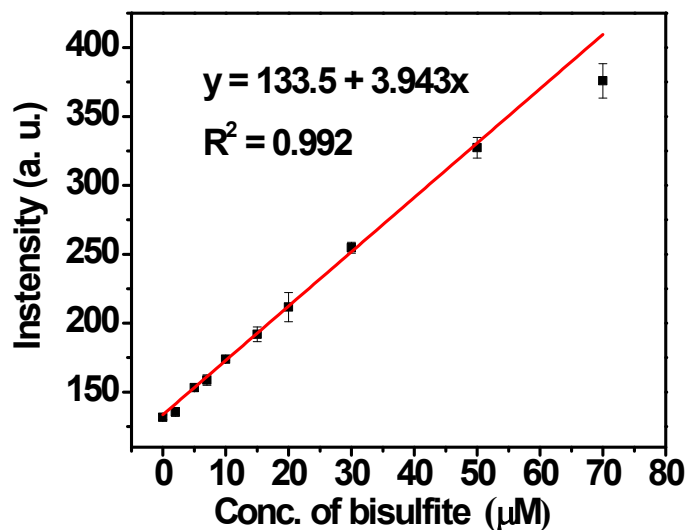

Fig. S20. Correlation between the phosphorescence intensity and bisulfite concentration after **Ru-azo** (10 μM) was reacted with different concentrations of bisulfite in 25 mM PBS buffer of pH 7.4.

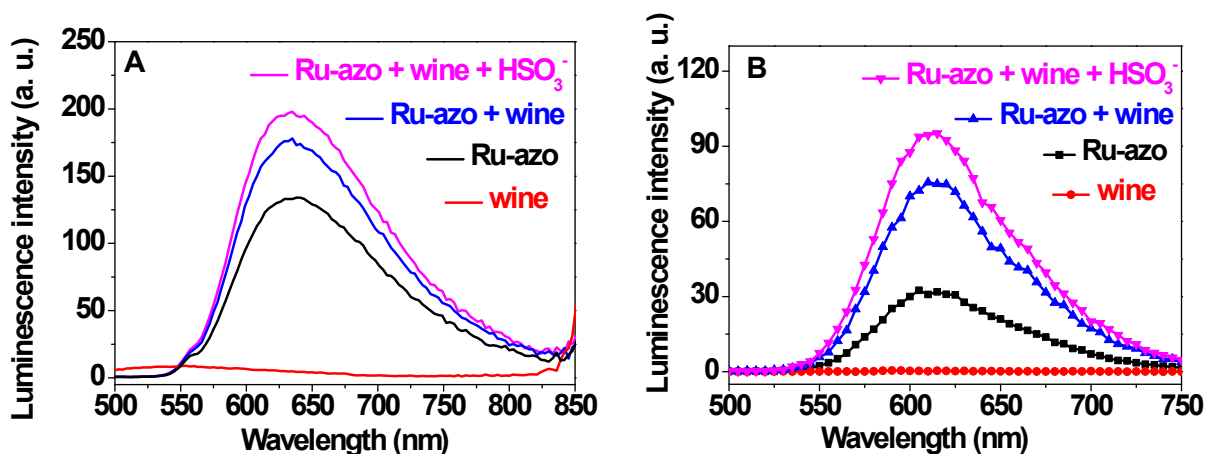

Fig. S21. Phosphorescence (A, 0 ns delay) and TGL (B, 100 ns delay) emission spectra ( $\lambda_{\text{ex}} = 450$  nm) of **Ru-azo** (10 μM), 50-fold diluted wine, and **Ru-azo** (10 μM) in 50-fold diluted wine before and after addition of bisulfite (5.0 μM).

## 5. Reference

1. Klosterman, J. K.; Linden, A.; Siegel, J. S., Synthesis of aryl-substituted 2-pyridyl-1,10-phenanthrolines; a series of oriented terpyridine analogues. *Organic & Biomolecular Chemistry* **2008**, 6 (15), 2755-2764.
2. Liu, C.; Zhang, R.; Zhang, W.; Liu, J.; Wang, Y.-L.; Du, Z.; Song, B.; Xu, Z. P.; Yuan, J., "Dual-Key-and-

Lock” Ruthenium Complex Probe for Lysosomal Formaldehyde in Cancer Cells and Tumors. *Journal of the American Chemical Society* **2019**, *141* (21), 8462-8472.

3. Sullivan, B. P.; Salmon, D. J.; Meyer, T. J., Mixed phosphine 2,2'-bipyridine complexes of ruthenium. *Inorganic Chemistry* **1978**, *17* (12), 3334-3341.

4. Frisch, M. J.; Trucks, G. W.; Schlegel, H. B.; Scuseria, G. E.; Robb, M. A.; Cheeseman, J. R.; Scalmani, G.; Barone, V.; Mennucci, B.; Petersson, G. A.; Nakatsuji, H.; Caricato, M.; Li, X.; Hratchian, H. P.; Izmaylov, A. F.; Bloino, J.; Zheng, G.; Sonnenberg, J. L.; Hada, M.; Ehara, M.; Toyota, K.; Fukuda, R.; Hasegawa, J.; Ishida, M.; Nakajima, T.; Honda, Y.; Kitao, O.; Nakai, H.; Vreven, T.; Montgomery Jr., J. A.; Peralta, J. E.; Ogliaro, F.; Bearpark, M. J.; Heyd, J.; Brothers, E. N.; Kudin, K. N.; Staroverov, V. N.; Kobayashi, R.; Normand, J.; Raghavachari, K.; Rendell, A. P.; Burant, J. C.; Iyengar, S. S.; Tomasi, J.; Cossi, M.; Rega, N.; Millam, N. J.; Klene, M.; Knox, J. E.; Cross, J. B.; Bakken, V.; Adamo, C.; Jaramillo, J.; Gomperts, R.; Stratmann, R. E.; Yazyev, O.; Austin, A. J.; Cammi, R.; Pomelli, C.; Ochterski, J. W.; Martin, R. L.; Morokuma, K.; Zakrzewski, V. G.; Voth, G. A.; Salvador, P.; Dannenberg, J. J.; Dapprich, S.; Daniels, A. D.; Farkas, Ö.; Foresman, J. B.; Ortiz, J. V.; Cioslowski, J.; Fox, D. J. *Gaussian 09*, Gaussian, Inc.: Wallingford, CT, USA, 2009.

5. Scalmani, G.; Frisch, M. J.; Mennucci, B.; Tomasi, J.; Cammi, R.; Barone, V., Geometries and properties of excited states in the gas phase and in solution: Theory and application of a time-dependent density functional theory polarizable continuum model. *The Journal of Chemical Physics* **2006**, *124* (9), 094107.

6. Lee, C.; Yang, W.; Parr, R. G., Development of the Colle-Salvetti correlation-energy formula into a functional of the electron density. *Physical Review B* **1988**, *37* (2), 785-789.

7. Wang, J.; Bai, F.-Q.; Xia, B.-H.; Zhang, H.-X., Efficient Blue-Emitting Ir(III) Complexes with Phosphine Carbanion-Based Ancillary Ligand: A DFT Study. *The Journal of Physical Chemistry A* **2011**, *115* (42), 11689-11695.

8. Ji, S.; Guo, H.; Wu, W.; Wu, W.; Zhao, J., Ruthenium(II) Polyimine–Coumarin Dyad with Non-emissive 3IL Excited State as Sensitizer for Triplet–Triplet Annihilation Based Upconversion. *Angewandte Chemie International Edition* **2011**, *50* (36), 8283-8286.

9. Cossi, M.; Barone, V., Time-dependent density functional theory for molecules in liquid solutions. *The Journal of Chemical Physics* **2001**, *115* (10), 4708-4717.
